# Supplementary material for: Experimental evidence for opposing effects of high deer density on tick-borne pathogen prevalence and hazard
Source: PubMed Central journal article supplement (PMC8485466; doi:10.1186/s13071-021-05000-0), 2021-09-30

# **Experimental evidence for opposing effects of high deer density on tick-borne disease pathogen prevalence and hazard**

Sara Gandy<sup>1,2\*</sup>, Elizabeth Kilbride<sup>1</sup>, Roman Biek<sup>1</sup>, Caroline Millins<sup>1,3\*</sup>, Lucy Gilbert<sup>1</sup>

<sup>1</sup>Institute of Biodiversity, Animal Health and Comparative Medicine, University of Glasgow, Glasgow, UK

<sup>2</sup>The James Hutton Institute, Craigiebuckler, Aberdeen, UK

<sup>3</sup>Institute of Infection, Veterinary and Ecological Sciences, University of Liverpool, Liverpool, UK.

\*Correspondence: [sara38.gandy@gmail.com](mailto:sara38.gandy@gmail.com)

## Additional file 1: Figure S1. Experimental design

Description: Experimental design for this study representing the four fenced plots (Plots 1, 4, 6 and 7) and high deer density plots (Plots 2, 3, 5 and 8). Coloured rectangles represent the different habitats within each plot. Not to scale.

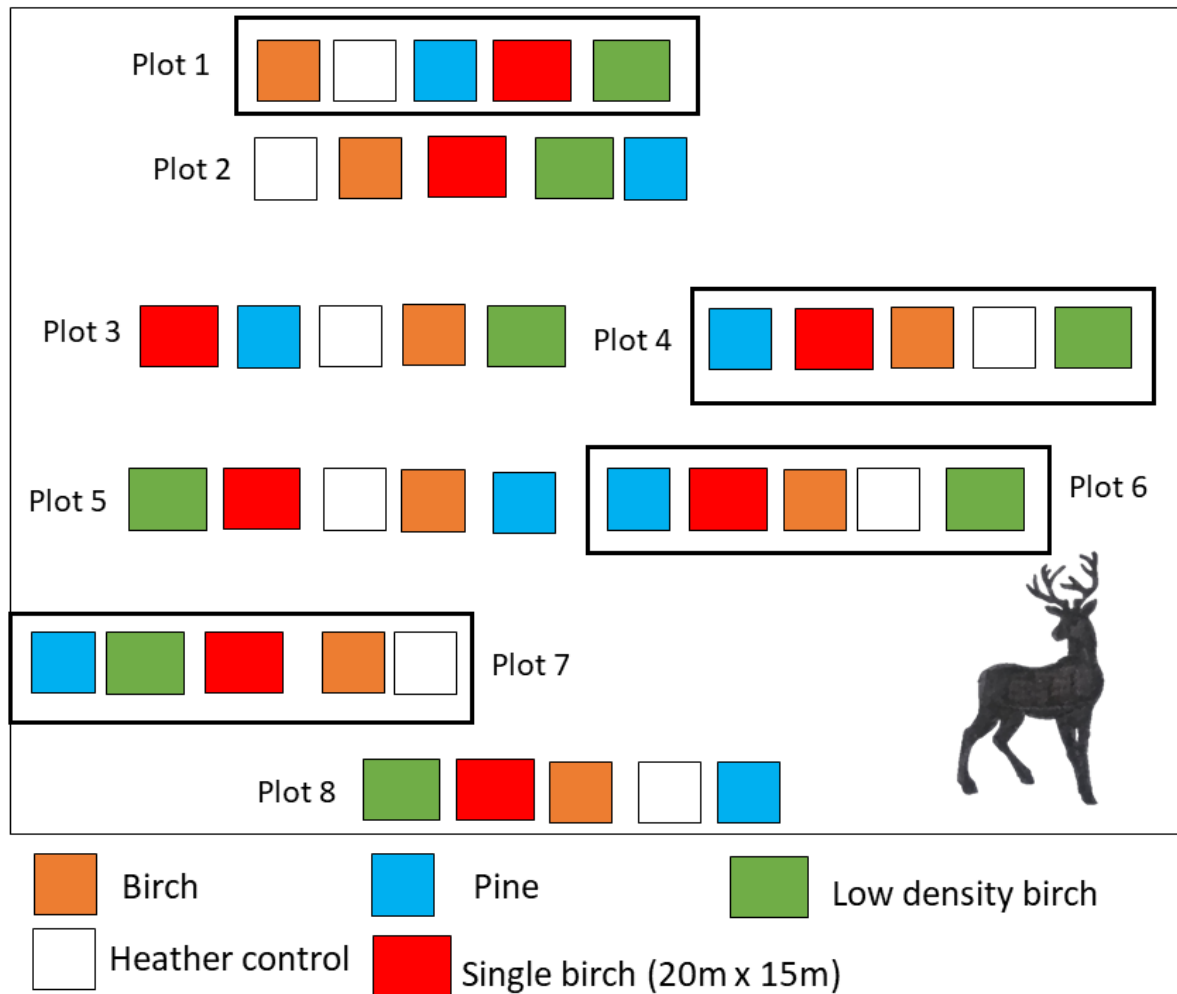

Supplement: 13071_2021_5000_MOESM1_ESM.pdf [file 13071_2021_5000_MOESM1_ESM.pdf]
