# Supplementary material for: Experimental evidence for opposing effects of high deer density on tick-borne pathogen prevalence and hazard
Source: PubMed Central journal article supplement (PMC8485466; doi:10.1186/s13071-021-05000-0), 2021-09-30
Supplement: 13071_2021_5000_MOESM2_ESM.pdf [file 13071_2021_5000_MOESM2_ESM.pdf]

# **Experimental evidence for opposing effects of high deer density on tick-borne disease pathogen prevalence and hazard**

Sara Gandy<sup>1,2\*</sup>, Elizabeth Kilbride<sup>1</sup>, Roman Biek<sup>1</sup>, Caroline Millins<sup>1,3\*</sup>, Lucy Gilbert<sup>1</sup>

<sup>1</sup>Institute of Biodiversity, Animal Health and Comparative Medicine, University of Glasgow, Glasgow, UK

<sup>2</sup>The James Hutton Institute, Craigiebuckler, Aberdeen, UK

<sup>3</sup>Institute of Infection, Veterinary and Ecological Sciences, University of Liverpool, Liverpool, UK.

\*Correspondence: [sara38.gandy@gmail.com](mailto:sara38.gandy@gmail.com)

## Additional file 2: Summary tables for GLMs and GLMMs

Description: Full summary tables from the selected models to explain what causes variations in questing nymph abundance (Table S1), vegetation height (Table S2), vegetation density (Table S2), tree height (Table S2) bank vole abundance (Table S3) nymphal infection prevalence (Table S4) and the density of nymphs infected with *B. burgdorferi* s.l. (Table S5).

**Table S1** Summary table from the selected model to explain what causes variations in questing nymph abundance

|                                | Estimate<br>(Log) | Std Error | z-value | p-value |
|--------------------------------|-------------------|-----------|---------|---------|
| <b>Conditional model</b>       |                   |           |         |         |
| Intercept                      | 2.46              | 0.10      | 24.93   | <0.001  |
| Deer treatment: deer exclusion | -2.35             | 0.13      | -18.69  | <0.001  |
| Month                          |                   |           |         |         |
| May                            | -0.24             | 0.08      | -2.79   | 0.005   |
| September                      | -0.29             | 0.07      | -4.35   | <0.001  |
| Year                           |                   |           |         |         |
| 2014                           | 0.04              | 0.06      | 0.69    | 0.49    |
| 2018                           | 0.89              | 0.08      | 11.08   | <0.001  |
| 2019                           | -0.23             | 0.10      | -2.41   | 0.02    |
| Habitat                        |                   |           |         |         |
| Heather                        | -0.83             | 0.06      | -13.27  | <0.001  |
| Pine                           | -0.16             | 0.06      | -2.77   | 0.006   |
| Relative humidity              | -0.18             | 0.03      | -5.28   | <0.001  |
| Ground wet: yes                | -0.49             | 0.18      | -2.77   | 0.006   |
| Temperature                    | -0.10             | 0.04      | -2.36   | 0.02    |
| <b>Zero-inflation model</b>    |                   |           |         |         |
| Intercept                      | 0.04              | 0.06      | 0.69    | <0.001  |
| Deer treatment: deer exclusion | 0.89              | 0.08      | 11.08   | <0.001  |
| Month: May                     | -0.23             | 0.10      | -2.41   | <0.001  |
| Month: September               | -0.83             | 0.06      | -13.27  | 0.99    |
| Habitat: heather               | -0.16             | 0.06      | -2.77   | <0.001  |
| Habitat: pine                  | -0.18             | 0.03      | -5.28   | 0.97    |
| Year: 2014                     | -0.49             | 0.18      | -2.77   | 0.01    |
| Year: 2018                     | -0.10             | 0.04      | -2.36   | <0.001  |
| Year: 2019                     | -0.57             | 0.20      | -2.81   | <0.001  |
| Ground wet: yes                | 1.86              | 0.33      | 5.70    | <0.001  |

**Table S2** Summary table from the selected model to explain what causes variations in ground vegetation height, ground vegetation density and tree height

|                                | Estimate (Log) | Std Error | t-value |
|--------------------------------|----------------|-----------|---------|
| <b>Vegetation height</b>       |                |           |         |
| Intercept                      | 32.90          | 3.39      | 9.69    |
| Deer treatment: deer exclusion | 14.46          | 4.76      | 3.04    |
| Month                          |                |           |         |
| May                            | -4.59          | 0.43      | -10.65  |
| September                      | -1.45          | 0.43      | -3.38   |
| Year                           |                |           |         |
| 2014                           | 4.46           | 0.44      | 10.10   |
| 2018                           | 7.81           | 0.51      | 15.32   |
| 2019                           | 6.82           | 0.52      | 13.15   |
| Habitat                        |                |           |         |
| Heather                        | 2.75           | 0.43      | 6.41    |
| Pine                           | 1.19           | 0.43      | 2.77    |

**Table S3** Summary table from the selected model to explain what causes variations in bank vole abundance

|                                     | Estimate (Log) | Std Error | z-value | p-value |
|-------------------------------------|----------------|-----------|---------|---------|
| <b>Model with deer treatment</b>    |                |           |         |         |
| Intercept                           | -5.27          | 0.71      | -7.44   | <0.001  |
| Deer treatment: deer exclusion      | 2.62           | 0.74      | 3.54    | <0.001  |
| <b>Model with vegetation height</b> |                |           |         |         |
| Intercept                           | -9.51          | 1.86      | -5.11   | <0.001  |
| Vegetation height                   | 0.16           | 0.05      | 3.57    | <0.001  |
| Year: 2018                          | -2.32          | 0.78      | -3.00   | 0.003   |

**Table S4** Summary table from the selected model to explain what causes variations in nymphal infection prevalence

|                                                                                                       | Estimate (log) | Std Error | z-value | p-value |
|-------------------------------------------------------------------------------------------------------|----------------|-----------|---------|---------|
| <b>Model focussing on deer treatment (<i>B. burgdorferi</i> s.l.) H2 – dilution hypothesis</b>        |                |           |         |         |
| Intercept                                                                                             | -6.20          | 0.96      | -6.47   | <0.001  |
| Deer treatment: deer exclusion                                                                        | 0.77           | 0.52      | 1.48    | 0.14    |
| Month                                                                                                 |                |           |         |         |
| May                                                                                                   | -1.07          | 0.83      | -1.30   | 0.20    |
| September                                                                                             | 0.90           | 0.50      | 1.79    | 0.07    |
| Habitat                                                                                               |                |           |         |         |
| Heather                                                                                               | 1.05           | 0.70      | 1.49    | 0.14    |
| Pine                                                                                                  | 1.45           | 0.62      | 2.34    | 0.02    |
| Year                                                                                                  |                |           |         |         |
| 2014                                                                                                  | 0.72           | 0.74      | 0.97    | 0.33    |
| 2018                                                                                                  | -1.03          | 0.95      | -1.09   | 0.28    |
| 2019                                                                                                  | 1.02           | 0.70      | 1.46    | 0.14    |
| <b>Model focussing on bank vole abundance (<i>B. afzelii</i>) H3 – ecological cascades hypothesis</b> |                |           |         |         |
| Intercept                                                                                             | -7.41          | 1.22      | -6.08   | <0.001  |
| Bank vole abundance year <sub>t-1</sub>                                                               | 0.05           | 0.05      | 1.06    | 0.29    |
| Month                                                                                                 |                |           |         |         |
| May                                                                                                   | 0.90           | 1.23      | 0.73    | 0.47    |
| September                                                                                             | 2.48           | 1.06      | 2.34    | 0.02    |
| Year: 2019                                                                                            | 1.90           | 0.79      | 2.41    | 0.02    |

**Table S5** Summary table from the selected model to explain what causes variations in the density of nymphs infected with *B. burgdorferi* s.l.

|                                | Estimate (Log) | Std Error | z-value | p-value |
|--------------------------------|----------------|-----------|---------|---------|
| <b>Conditional model</b>       |                |           |         |         |
| Intercept                      | -5.85          | 0.75      | -7.84   | <0.001  |
| Deer treatment: deer exclusion | -1.76          | 0.28      | -6.26   | <0.001  |
| Habitat                        |                |           |         |         |
| Heather                        | 0.05           | 0.42      | 0.12    | 0.91    |
| Pine                           | 0.83           | 0.39      | 2.12    | 0.03    |
| Temperature                    | 0.10           | 0.05      | 2.27    | 0.02    |
| <b>Zero-inflation model</b>    |                |           |         |         |
| Intercept                      | -1.61          | 1.10      | -1.47   | 0.14    |
| Ground wet: no                 | 3.10           | 1.15      | 2.71    | 0.007   |
