# Supplementary material for: Experimental evidence for opposing effects of high deer density on tick-borne pathogen prevalence and hazard
Source: PubMed Central journal article supplement (PMC8485466; doi:10.1186/s13071-021-05000-0), 2021-09-30
Supplement: 13071_2021_5000_MOESM3_ESM.pdf [file 13071_2021_5000_MOESM3_ESM.pdf]

# **Experimental evidence for opposing effects of high deer density on tick-borne disease pathogen prevalence and hazard**

Sara Gandy<sup>1,2\*</sup>, Elizabeth Kilbride<sup>1</sup>, Roman Biek<sup>1</sup>, Caroline Millins<sup>1,3\*</sup>, Lucy Gilbert<sup>1</sup>

<sup>1</sup>Institute of Biodiversity, Animal Health and Comparative Medicine, University of Glasgow, Glasgow, UK

<sup>2</sup>The James Hutton Institute, Craigiebuckler, Aberdeen, UK

<sup>3</sup>Institute of Infection, Veterinary and Ecological Sciences, University of Liverpool, Liverpool, UK.

\*Correspondence: [sara38.gandy@gmail.com](mailto:sara38.gandy@gmail.com)

### Additional file 3: GLMM for the density of infected nymphs with *B. afzelii*

The mixed effect model used to investigate the effect of fencing, habitat, month and year on Lyme disease hazard for *B. burgdorferi* s.l. was conducted for *B. afzelii* infections only. As seen from Table 7, results are similar to the other model and Lyme disease hazard is predicted to be higher in high deer density plots (predicted DIN=1.18, 95%CI: 0-6.24) compared to deer exclusion plots (predicted DIN=2.26,95%CI: 0-18.50).

**Table S6** Results from the selected model to explain what causes variations in the density of infected nymphs for *B. afzelii*.  $\Delta$ AICc indicates the increase in AICc after dropping each variable from the model

|                                | Estimate<br>(Log) | Std<br>Error | z-value | p-value | $\Delta$ AICc |
|--------------------------------|-------------------|--------------|---------|---------|---------------|
| <b>Conditional part</b>        |                   |              |         |         |               |
| Intercept                      | -4.49             | 0.36         | -17.48  | <0.001  |               |
| Deer treatment: deer exclusion | -1.46             | 0.19         | -7.64   | <0.001  | 18.6          |
| Habitat                        |                   |              |         |         | 9.2           |
| Heather                        | -0.20             | 0.32         | -0.60   | 0.55    |               |
| Pine                           | 0.89              | 0.27         | 3.23    | 0.001   |               |
| <b>Zero inflation part</b>     |                   |              |         |         |               |
| Intercept                      | -1.14             | 1.14         | -1.00   | 0.32    |               |
| Deer treatment: deer exclusion | -1.16             | 0.73         | -1.60   | 0.11    |               |
| Ground wet: Yes                | 3.44              | 1.21         | 2.86    | 0.004   |               |
